# Supplementary material
Source: Springer Nature journal article supplement (https://www.springermedizin.de/resource/supplementary/12879_2011_1656_MOESM1_ESM.pdf/9442988)

Proportion of patients with persisting pain

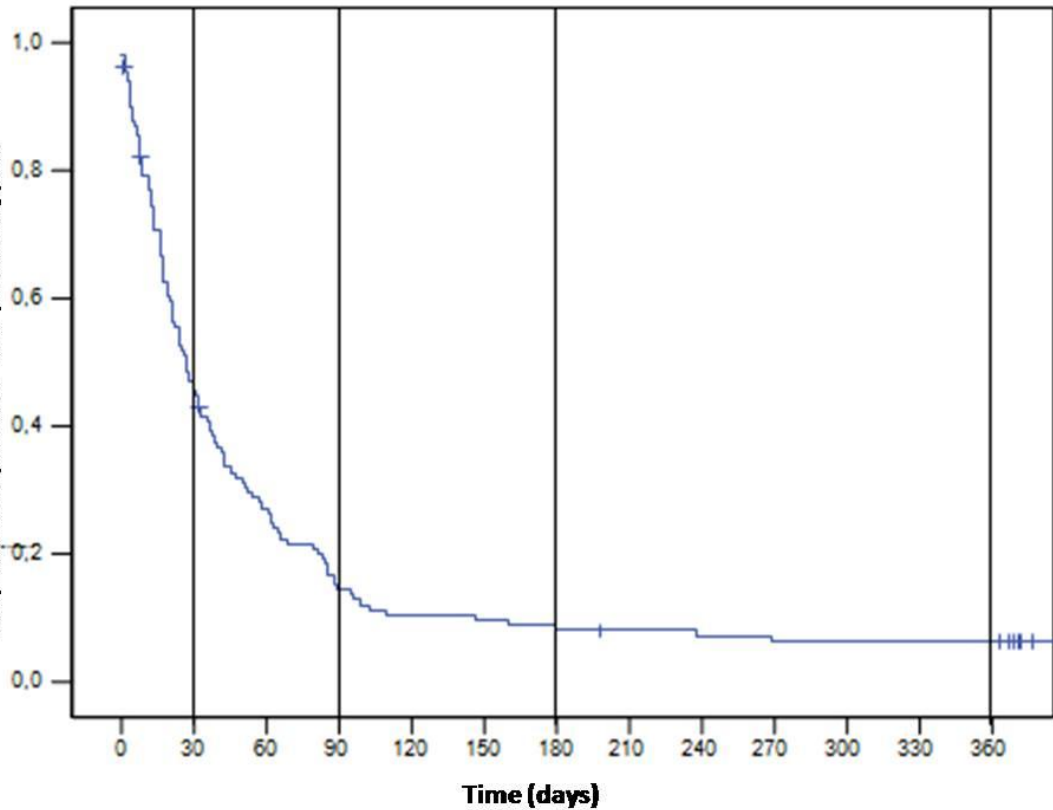

Supplement: MOESM1 [file 9442988]
